# Supplementary material for: Fluorine-free coating-based droplet triboelectric nanogenerators for highly efficient energy harvesting
Source: Royal Society of Chemistry journal article supplement (doi:10.1039/d3ta07103k), 2024-01-01
Supplement: d3ta07103k1.pdf [file d3ta07103k1.pdf]

*Supporting Information*

**Fluorine-free coating-based droplet triboelectric nanogenerators  
for highly efficient energy harvesting**

Hanchao Wang<sup>a,c</sup>, Min Feng<sup>c,d</sup>, Wenpeng Wang<sup>c</sup>, Wenqi Wang<sup>c</sup>, Jie Meng<sup>c</sup>, Yupeng Liu<sup>c</sup>, Qiang Wang<sup>a\*</sup>, Daoai Wang<sup>a,b,c\*</sup>

<sup>a</sup> *College of Chemistry and Pharmaceutical Sciences, Qingdao Agricultural University, Qingdao, 266109, China*

<sup>b</sup> *Center of Materials Sciences and Opto-Electronic Technology University of Chinese Academy of Sciences, Beijing 100049, China*

<sup>c</sup> *State Key Laboratory of Solid Lubrication, Lanzhou Institute of Chemical Physics, Chinese Academy of Sciences, Lanzhou 730000, China*

<sup>d</sup> *Shandong Laboratory of Yantai Advanced Materials and Green Manufacturing, Yantai 265503, China.*

*\*Corresponding Author. E-mail: 200101050@qau.edu.cn, wangda@licp.cas.cn*

## Supplementary materials

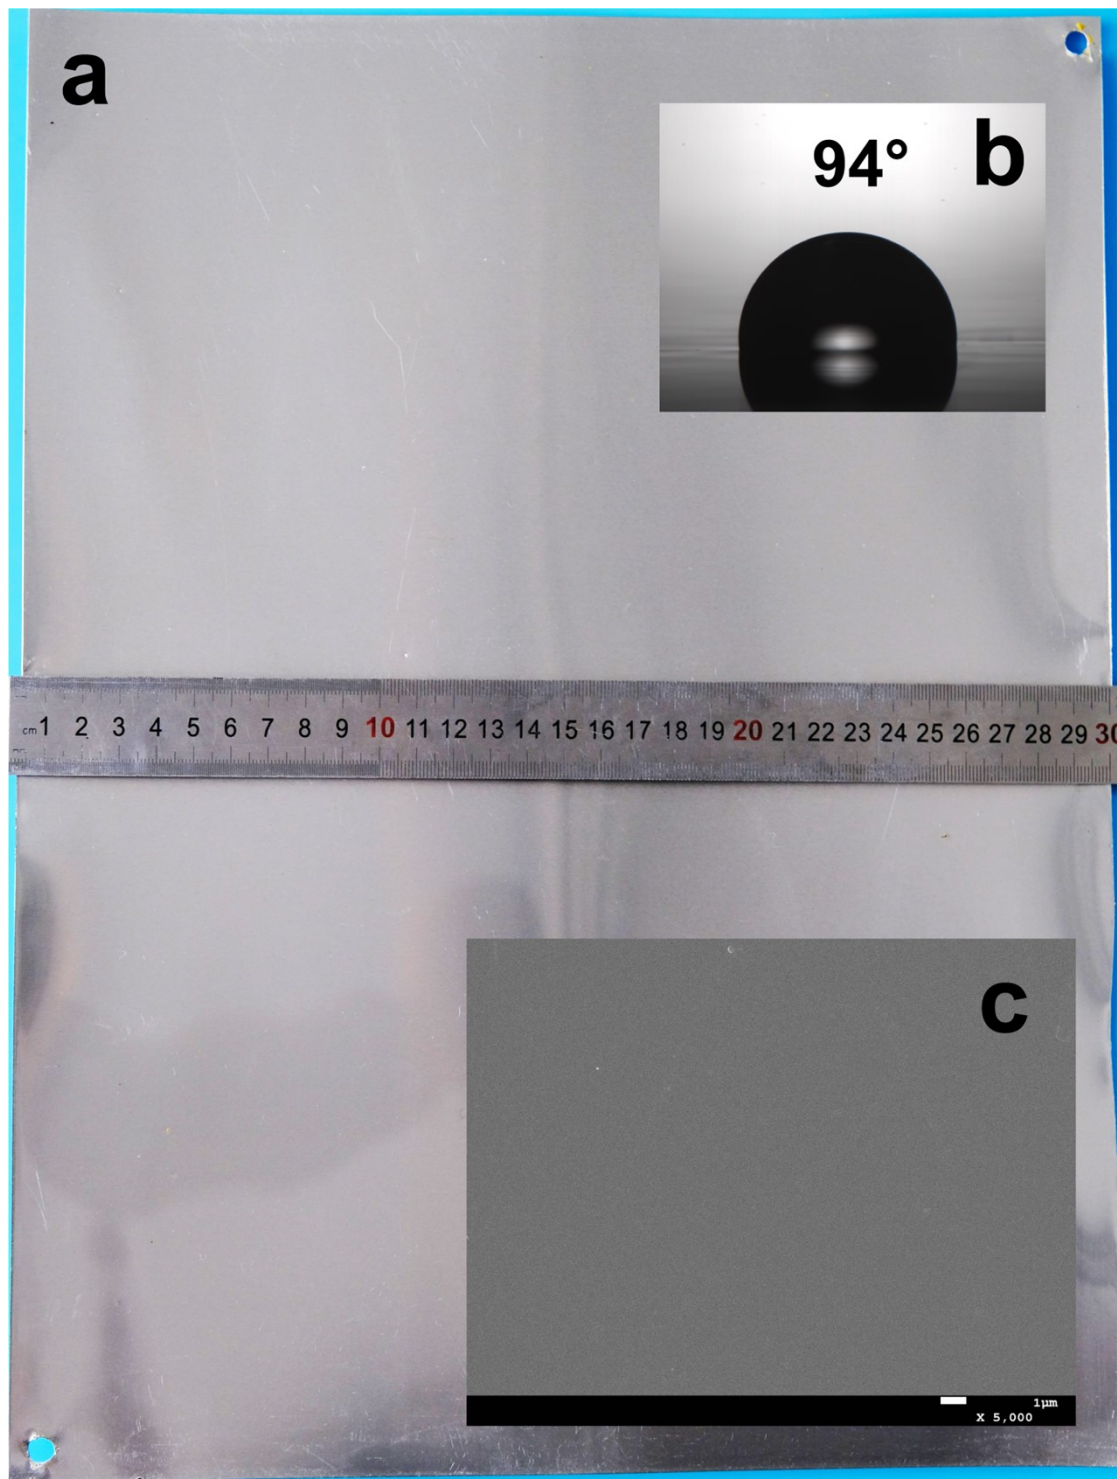

**Figure S1.** (a) The silicon-modified acrylic resin coating prepared on aluminum sheets using the spray deposition process (30 cm × 40 cm) exhibits a (b) hydrophobic angle of 94° and a (c) smooth, even surface.

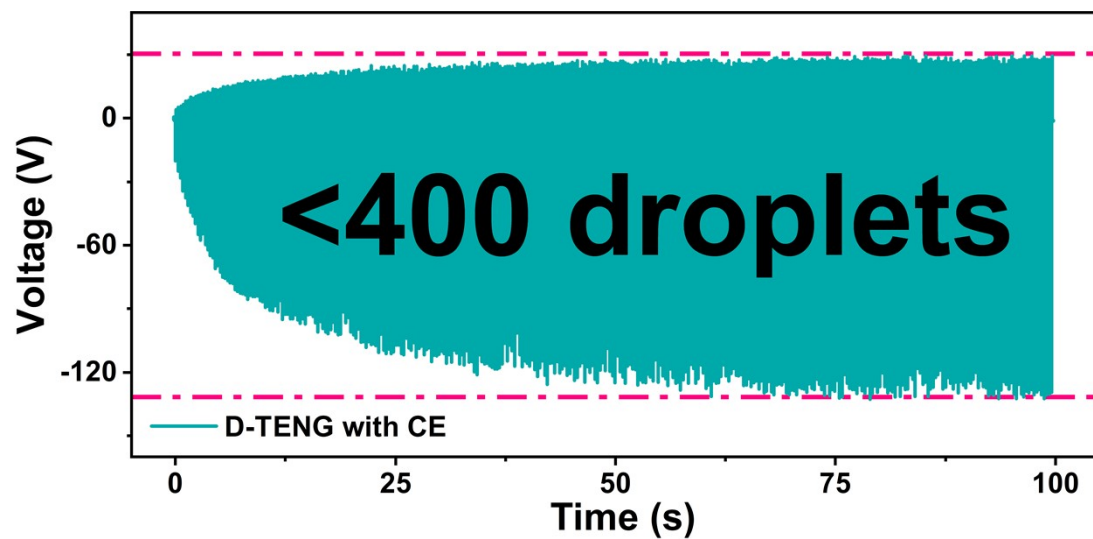

**Figure S2.** The negatively charged accumulation on the coating surface progressively reached saturation (less than 400 droplets).

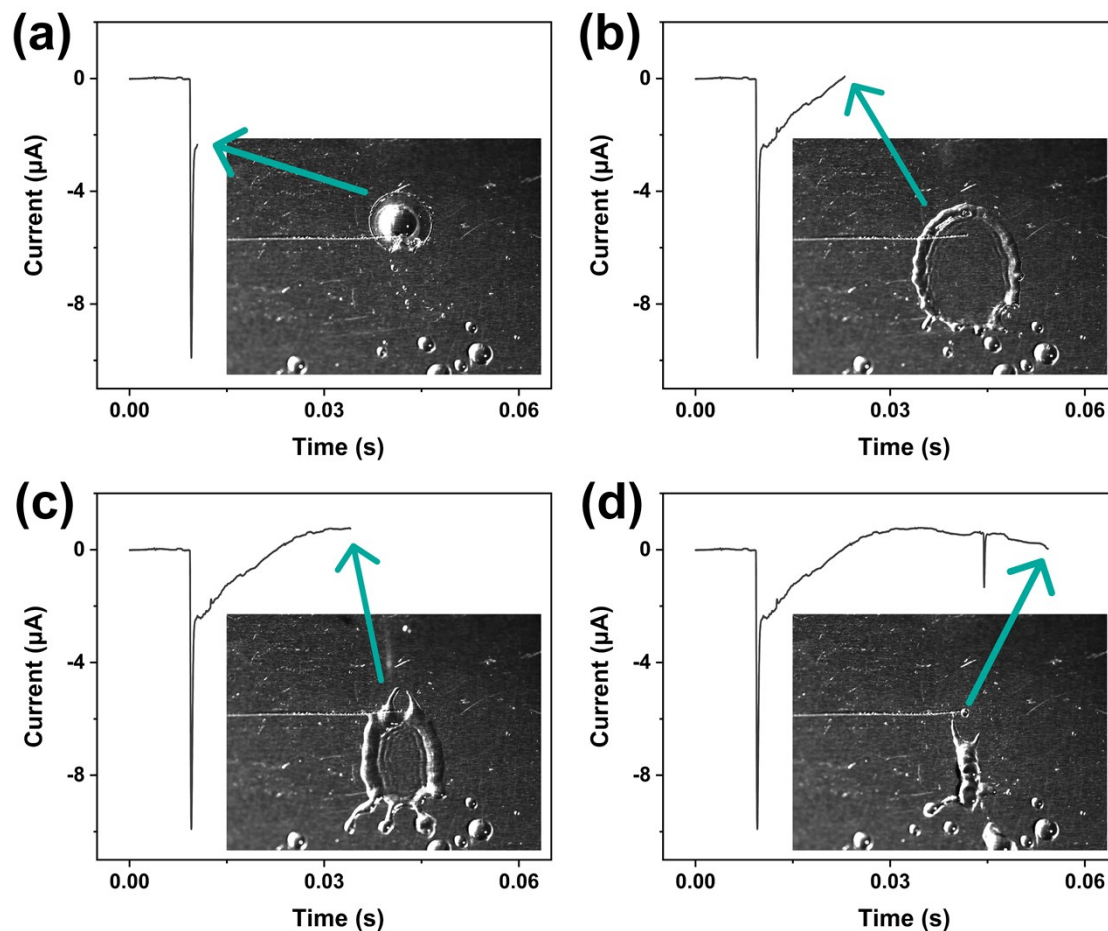

**Figure S3. Correspondence between current signal and water droplet motion state.** (a) The water droplet comes into contact with electrode  $E_1$ , initiating the discharge of capacitor  $C_a$ . (b) The water droplet spreads and reaches its maximum area, marking the completion of  $C_a$  discharge and the commencement of its charging phase. (c) As the water droplet contracts, the voltage across  $C_a$  during its charging phase reaches its maximum value. (d) The water droplet ceases to make contact with  $E_1$ , resulting in circuit interruption.

**Video S1:** Correspondence between current signal and water droplet motion state.

**Video S2:**  $E_{TL}$  illuminates 180 LEDs with a single droplet of water.

**Video S3:** The demonstration of device charges a  $1\mu\text{F}$  capacitor.
